# Supplementary material
Source: PubMed Central journal article supplement (PMC4136042)
Supplement: AAC.00084-14_zac008143148so1.pdf [file AAC.00084-14_zac008143148so1.pdf]

Figure S1. Secondary structures of; panel A, the wild-type PmrB protein; panel B, protein PmrB exhibiting the Thr157Pro substitution. Position 157 is boxed in red.

(A)

```

. 10 . 20 . 30 . 40 . 50
MALFATETWTMRHRLLLTIGAILVVCQLISVFWLWHSKEQIQLLVASAI
helix HHHHHHHHHHHHHHHHHHHHH HHHH HHHHHHHHHHHH
sheet EEEEEEEEEEEEEEE
turns
coil
. 60 . 70 . 80 . 90 . 100
EGHNNQKHVEHEVREAVASLLVPSLLIVGLALYISMLAVRKITRPLSRLQ
helix HH HHHHHHHHHHHHH H HHHHHHHHHH
sheet EE EEEEEEE EEEE E
turns
coil CCCCC C CCCCC
. 110 . 120 . 130 . 140 . 150
SELENRTPDNLTPIVLSESVPEVTAVTTALNQLVSRNLPLDRERLFTAD
helix HHHHHHHHHHHHHHHHHHHHH HHHHHHHHHH HHHHHHHHHH
sheet EEEEEEE EEEEEEE
turns TTT TTT
coil CCC C C CCCC CCCC
. 160 . 170 . 180 . 190 . 200
VAHELRTPlaglrhlhllAKVHGMGVDPliQLRDQMTTISISQLLQLARV
helix HHHHHHHHHHHHHHHHHHHHHHH H
sheet EEE EEE EEEEEEE
turns TT T
coil CCC CCCCC
. 210 . 220 . 230 . 240 . 250
GQSFSAGSYQQVLLDDVVKPLQDELEAMLAqrqqrlllIDIENEAVVSG
helix HHHHHHHHHHHHHHHHHHHHH HHHHHHHHHH
sheet E EEEEEEE EEE EEE
turns T T T
coil CCCC CC CCC
. 260 . 270 . 280 . 290 . 300
DATLIRVILRNLVENAHRYSPGSTIRVSVKAGLMPVMAVEDEGPGIDEA
helix HHH HHH H H HHHHH HHHHH
sheet EEEEEEE EEEEE E EE
turns TTT TTT
coil CC CC C CCC CC
. 310 . 320 . 330 . 340 . 350
KSGELSKAFVRMDSRYGGIGLGLSIVTRIAQLHDAQFFLHNRQPGPGVRA
helix HHHHHHHHHH HHHHHHHH
sheet EE E EEEEEEE EE EEE
turns TTTTT TTT
coil C CCCCC
. 360
WVLFPPQRGGQNVSTH
helix
sheet EEEE EEE
turns TTTT
coil C CCC

```

(B)

```
      . 10 . 20 . 30 . 40 . 50
MALFATETWTMRHRLLLTIGAILVVCQLISVFWLWHSKEQIQLLVASAI
helix HHHHHHHHHHHHHHHHH HHHH HHHHHHHHHHH
sheet EEEEEEEEEEEEEEE
turns
coil
      . 60 . 70 . 80 . 90 . 100
EGHNNQKHVEHEVREAVASLLVPSLLIVGLALYISMLAVRKITRPLSRLQ
helix HH HHHHHHHHHHHHH H HHHHHHHHH
sheet EE EEEEEEE EEEE E
turns
coil CCCCC C CCCCC
      . 110 . 120 . 130 . 140 . 150
SELENRTPDNLTPIVLSESVPEVTAVTTALNQLVSRNLPLDRERLFTAD
helix HHHHHHHHHHH HHHHHHHHH HHHHHHHHH
sheet EEEEEEE EEEEEEE
turns TTT TTT
coil CCC C C CCCC CCCC
      . 160 . 170 . 180 . 190 . 200
VAHELRFPlaglrhllellAKVHGMGVDPliQLRlDQMTTlSISQLLQLARV
helix HHHH HHHHHHHHHHHHH H
sheet EEE EEE EEEEEEE
turns T TT T
coil CCC CCC CCCC
      . 210 . 220 . 230 . 240 . 250
GQSFSAGSYQQVLLDDVVKPLQDELEAMLAgrqqrlllIDIENEAVVSG
helix HHHHHHHHHHHHHHH HHHHHHHHH
sheet E EEEEEEE EEE EEE
turns T T T
coil CCCC CC CCC
      . 260 . 270 . 280 . 290 . 300
DATLIRVILRNLVENAHRYSPGSTIRVSVKAGLMPVMAVEDEGPGIDEA
helix HHH HHH H H HHHH HHHH
sheet EEEEEEE EEEEE E EE
turns TTT TTT
coil CC CC C CCC CC
      . 310 . 320 . 330 . 340 . 350
KSGELSKAFVRMDSRYGGIGLGLSIVTRIAQLHDAQFFLHNRQPGPGVRA
helix HHHHHHHHH HHHHHHH
sheet EE EEEEEEE EE EEE
turns TTTTT TTT
coil C CCCCC
      . 360
WVLFPPQRGGQNVSTH
helix
sheet EEEE EEE
turns TTTT
coil C CCC
```
